# Supplementary material
Source: PubMed Central journal article supplement (PMC6176178)
Supplement: ajcr0008-1764-f7.pdf [file ajcr0008-1764-f7.pdf]

## miR-1281 promotes ER stress-induced apoptosis

**Table S1.** List of the upregulated miRNAs under TG treatment (Fold\_Change > 10)

| miRNA name       | Fold_Change      |
|------------------|------------------|
| Has-miR-10400-5p | 107.437732060573 |
| hsa-miR-7704     | 60.1751113799725 |
| hsa-miR-200a-5p  | 23.4518009754037 |
| hsa-miR-1281     | 14.2868865115169 |
| hsa-miR-302b-5p  | 11.5604091723554 |
| hsa-miR-12128    | 10.1631732622270 |
| hsa-miR-9718     | 10.0801168318166 |

**Table S2.** List of the upregulated miRNAs in p53 overexpressed Saos2 cells (Fold\_Change > 3)

| miRNA name   | Fold_Change |
|--------------|-------------|
| hsa-miR-34a  | 6.70        |
| hsa-miR-1915 | 6.52        |
| hsa-miR-1281 | 6.20        |
| hsa-miR-3195 | 5.73        |
| miR-149-3p   | 4.63        |
| hsa-miR-940  | 4.27        |

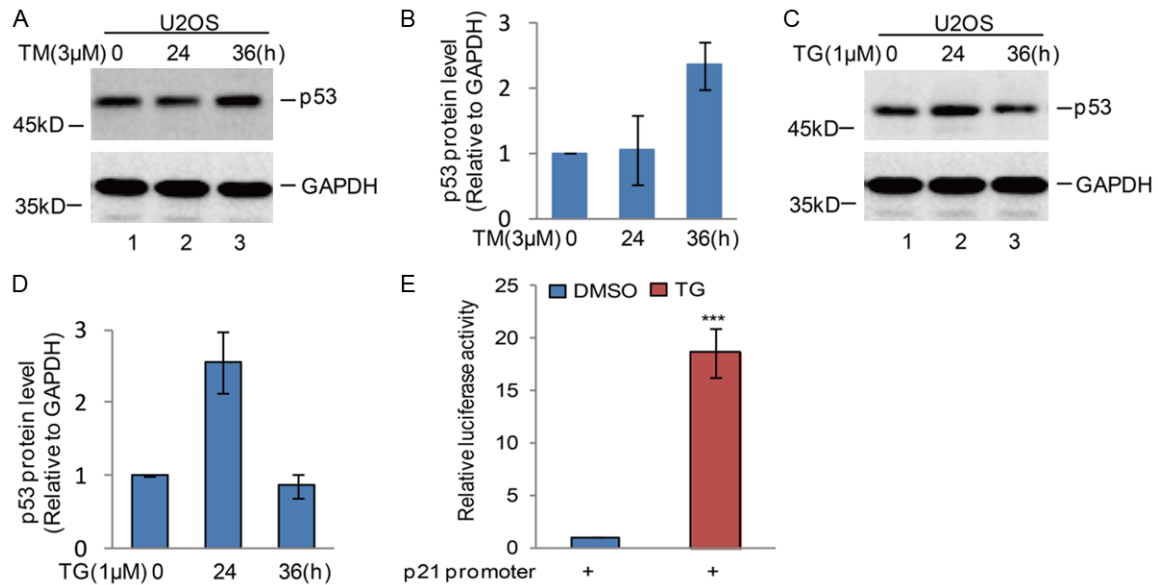

**Figure S1.** A-D. U2OS cells were treated with 3 μM TM or 1 μM TG at indicated times. The protein levels of p53 were analysed by western blotting assay. E. p21 promoter was transfected into U2OS cells and then the cells were treated with 1 μM TG at indicated times. The luciferase activity was measured. The data represent the means ± SD of three independent experiments; \*\*\*P < 0.001 vs. control.
